# Supplementary material
Source: PubMed Central journal article supplement (PMC6472966)
Supplement: NIHMS1523625-supplement-216_2019_1713_MOESM1_ESM.pdf [file NIHMS1523625-supplement-216_2019_1713_MOESM1_ESM.pdf]

## **Analytical and Bioanalytical Chemistry**

### **Electronic Supplementary Material**

#### **Population-based analysis of cell penetrating peptide uptake using a microfluidic droplet trapping array**

Nora Safa, Manibarathi Vaithiyathan, Shayan Sombolestani, Seleipiri Charles,  
Adam T. Melvin

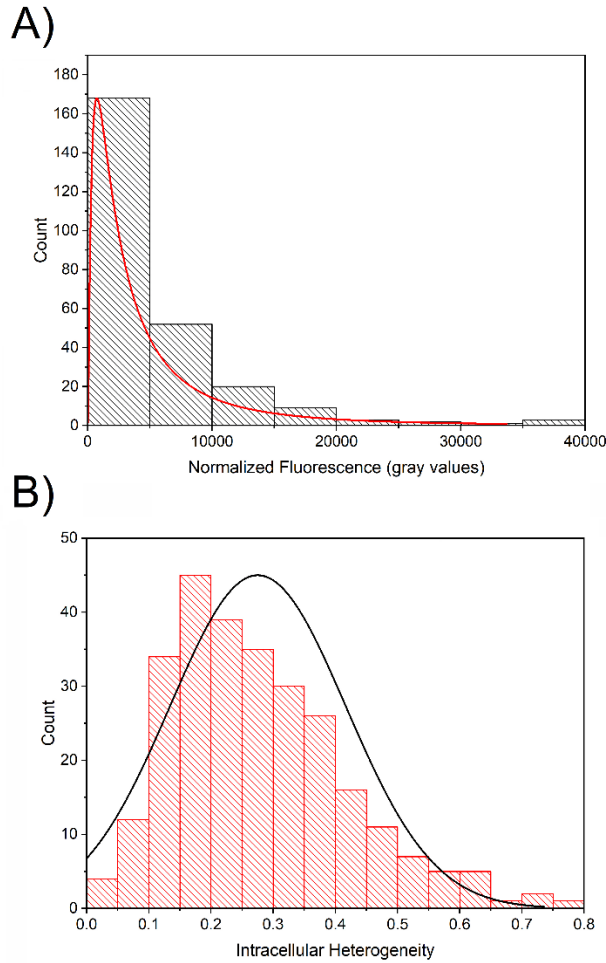

**Fig. S1 Population distribution of OWRWR peptide internalization and intracellular heterogeneity** (A) Uptake of 50  $\mu\text{M}$  OWRWR peptide solution in HeLa cells demonstrating logarithmic normal distribution ( $n=539$ ,  $r^2=0.65$ ,  $p<0.05$ ) and (B) Observed intracellular heterogeneity (COV) of 50  $\mu\text{M}$  OWRWR peptide solution in HeLa cells demonstrating normal distribution ( $n=274$ ,  $r^2=0.92$ ,  $p<0.0000001$ )

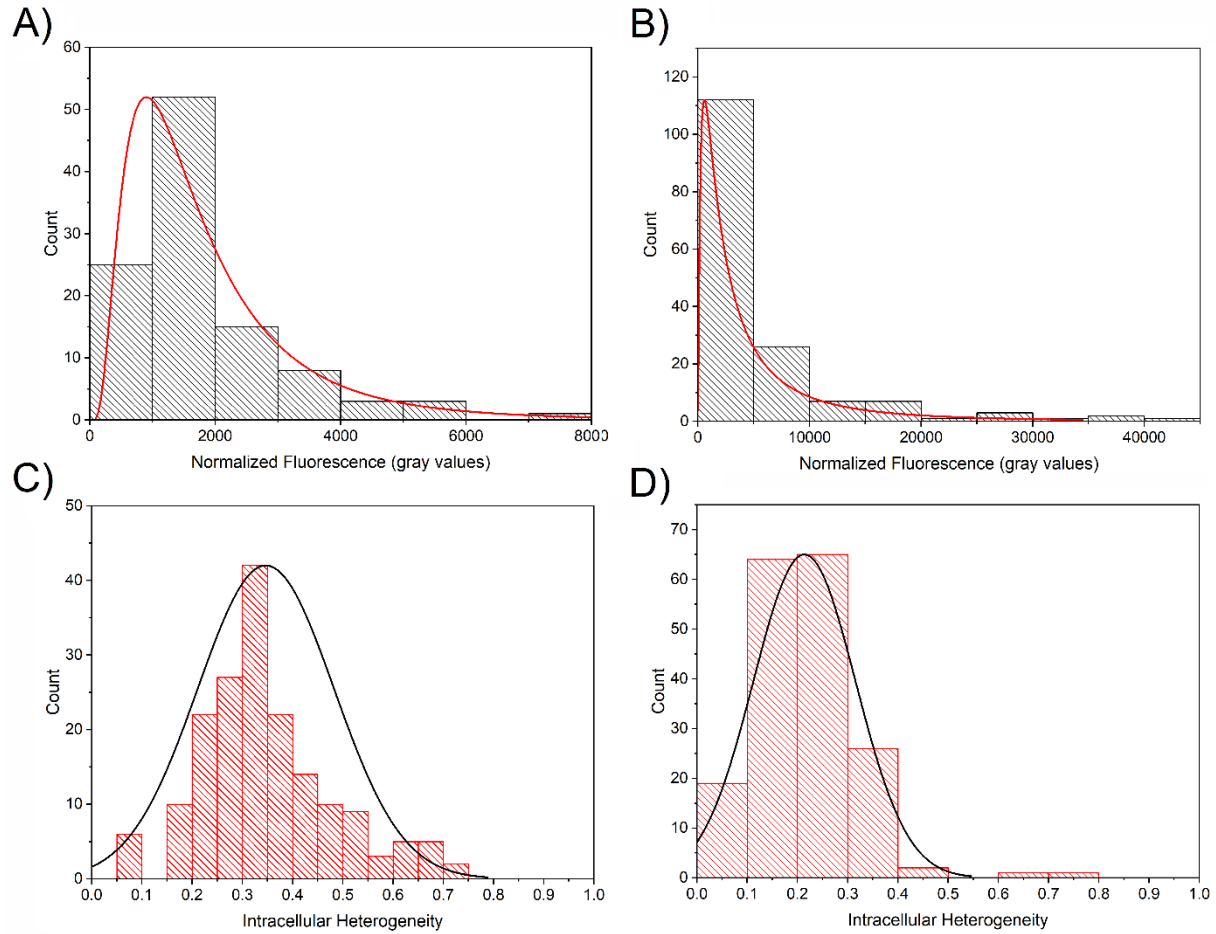

**Fig. S2 Population distributions of RWRWR peptide internalization and intracellular heterogeneity.** Uptake of (A) 10  $\mu\text{M}$  RWRWR peptide solution in HeLa cells demonstrating logarithmic normal distribution ( $n=177$ ,  $r^2=0.99$ ,  $p<0.00001$ ) and (B) 50  $\mu\text{M}$  RWRWR peptide solution in HeLa cells demonstrating logarithmic normal distribution ( $n=178$ ,  $r^2=0.91$ ,  $p<0.002$ ). (C) Observed intracellular heterogeneity (COV) of (C) 10  $\mu\text{M}$  RWRWR peptide solution in HeLa cells demonstrating normal distribution ( $n=177$ ,  $r^2=0.91$ ,  $p<0.000001$ ) and (D) 50  $\mu\text{M}$  RWRWR peptide solution in HeLa cells demonstrating normal distribution ( $n=178$ ,  $r^2=0.99$ ,  $p<0.00001$ )

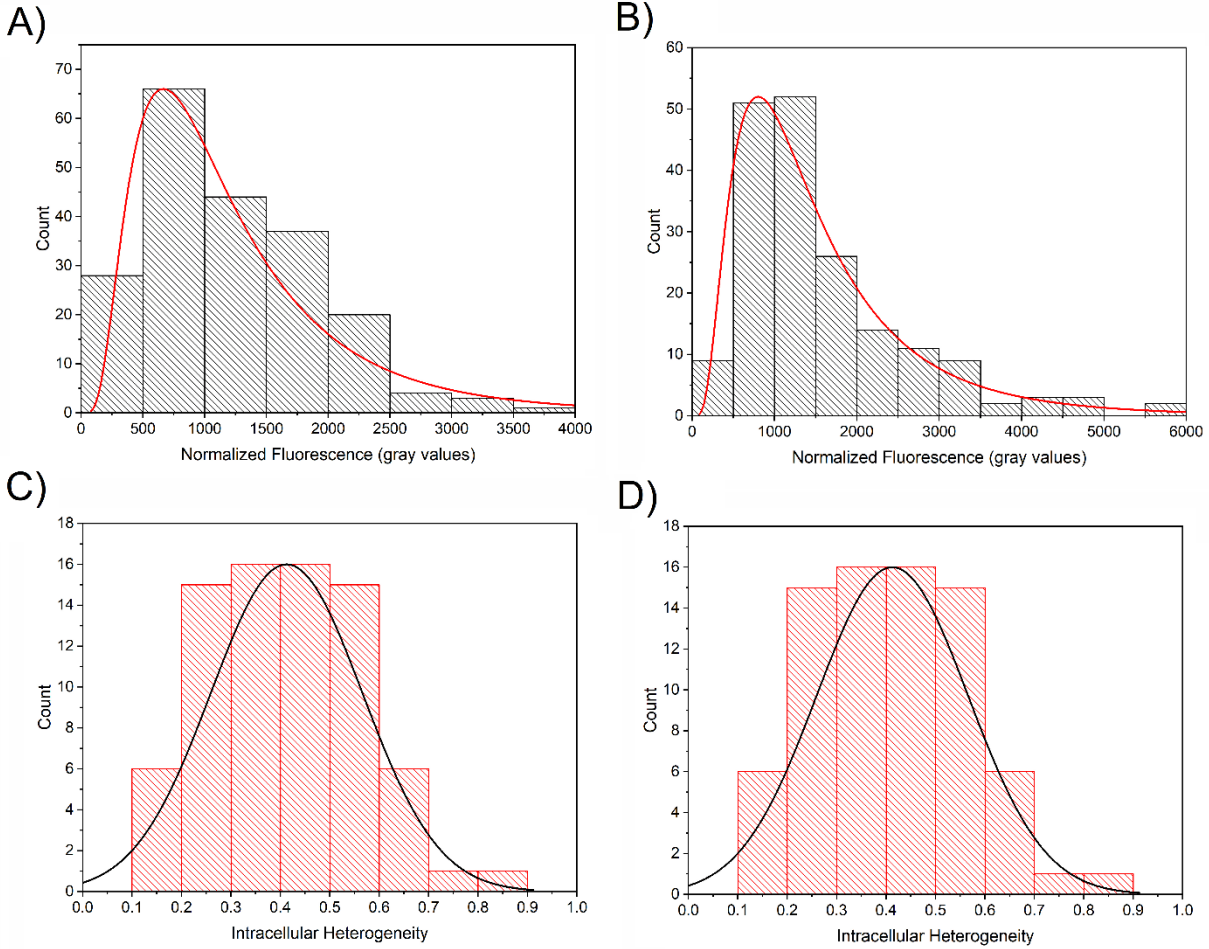

**Fig. S3 Population distributions of TAT peptide internalization and intracellular heterogeneity.** Uptake of (A) 10  $\mu\text{M}$  TAT peptide solution in HeLa cells demonstrating logarithmic normal distribution ( $n=98$ ,  $r^2=0.98$ ,  $p<0.0005$ ) and (B) 50  $\mu\text{M}$  TAT peptide solution in HeLa cells demonstrating logarithmic normal distribution ( $n=180$ ,  $r^2=0.98$ ,  $p<0.0000001$ ). (C) Observed intracellular heterogeneity (COV) of (C) 10  $\mu\text{M}$  TAT peptide solution in HeLa cells demonstrating normal distribution ( $n=98$ ,  $r^2=0.95$ ,  $p<0.001$ ) and (D) 50  $\mu\text{M}$  TAT peptide solution in HeLa cells demonstrating normal distribution ( $n=180$ ,  $r^2=0.95$ ,  $p<0.000001$ )

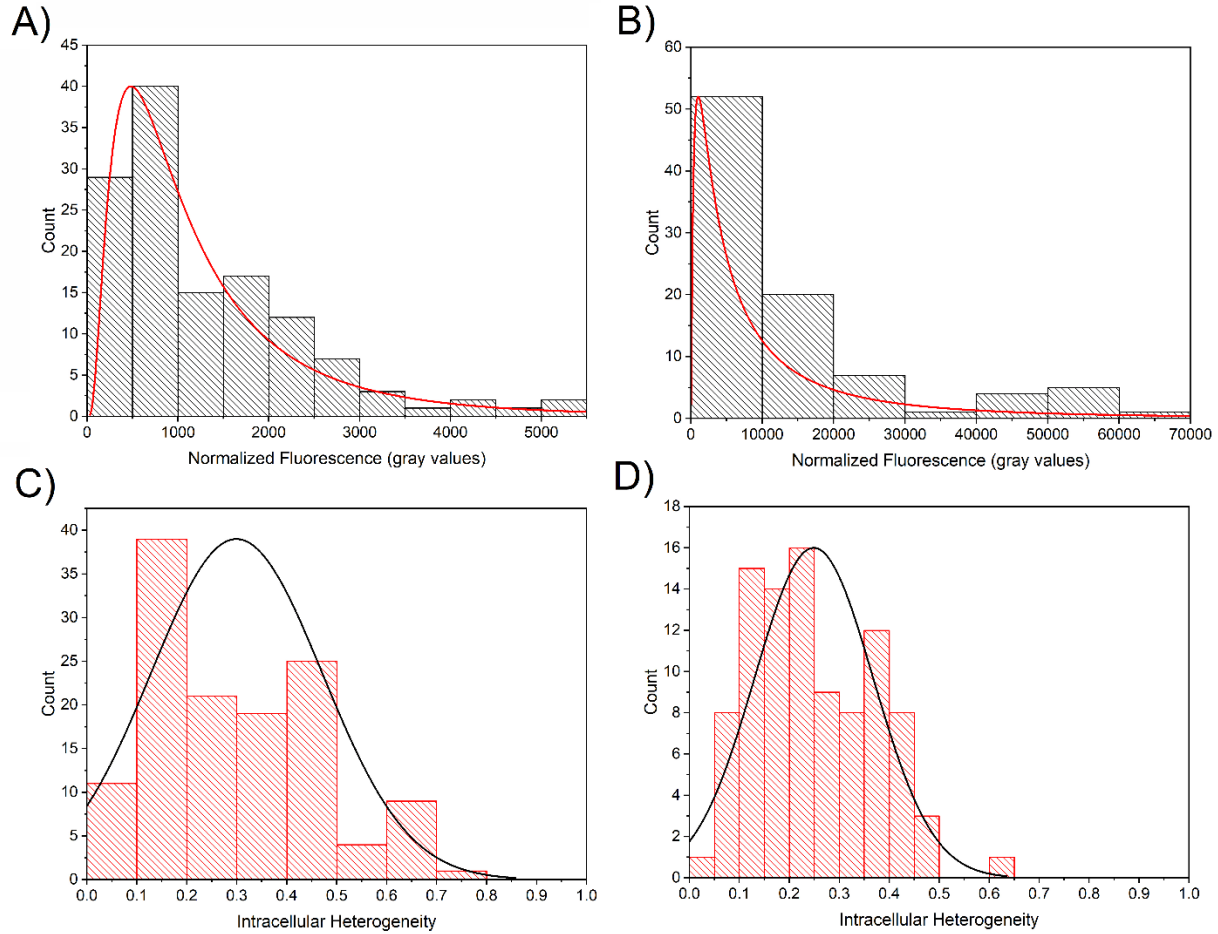

**Fig. S4 Population distributions of ARG peptide internalization and intracellular heterogeneity** Uptake of (A) 10  $\mu$ M ARG peptide solution in HeLa cells demonstrating logarithmic normal distribution ( $n=129$ ,  $r^2=0.94$ ,  $p<0.00001$ ) and (B) 50  $\mu$ M ARG peptide solution in HeLa cells demonstrating logarithmic normal distribution ( $n=95$ ,  $r^2=0.99$ ,  $p<0.0005$ ). (C) Observed intracellular heterogeneity (COV) of (C) 10  $\mu$ M ARG peptide solution in HeLa cells demonstrating normal distribution ( $n=129$ ,  $r^2=0.62$ ,  $p<0.05$ ) and (D) 50  $\mu$ M ARG peptide solution in HeLa cells demonstrating normal distribution ( $n=95$ ,  $r^2=0.80$ ,  $p<0.000005$ )

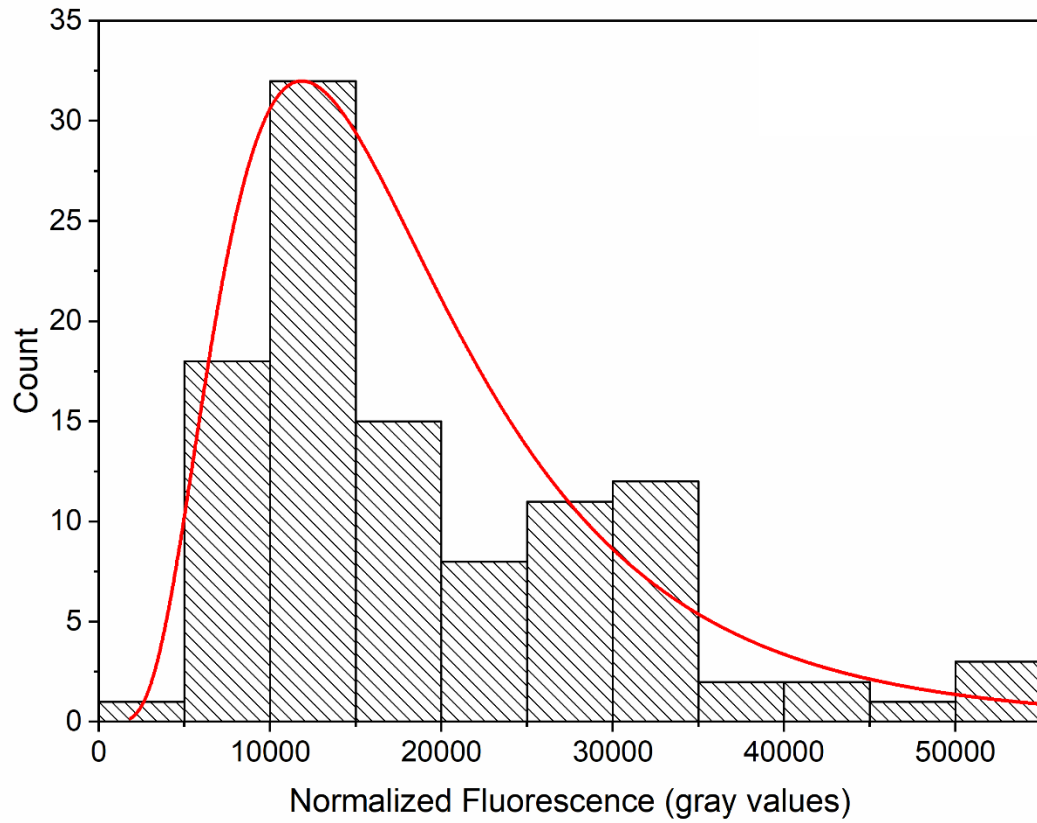

**Fig. S5 Population distribution of intracellular fluorescence in GFP-expressing HeLa cells.** The distribution histogram demonstrates a logarithmic normal trend as mathematically ( $n=105$ ,  $r^2=0.86$ ,  $p<0.0005$ )

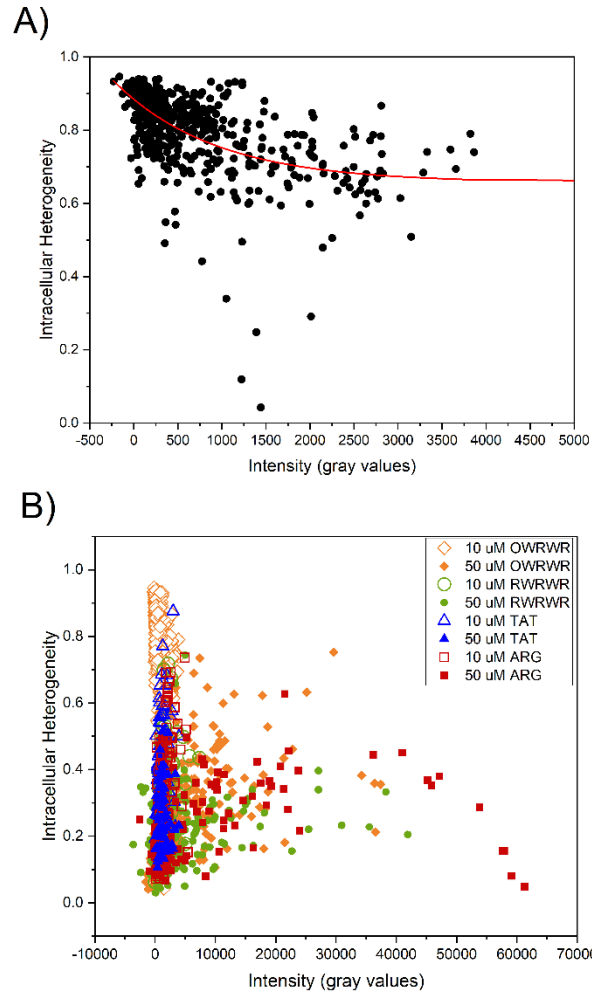

**Fig. S6 Correlation between intracellular peptide distribution and CPP uptake efficiency in single-cell level** (A) A correlation between intracellular heterogeneity (COV) and fluorescent intensity for cells incubated with 10 μM OWRWR simulated with an exponential function ( $n=537$ ,  $p<0.0001$ ). (B) Comparison of the single cell data of the intracellular heterogeneity and the median cellular fluorescence intensity for the entire population of HeLa cells analyzed

**Table S1** Deterministic indices testing the goodness of hierarchical clustering

|                                   | <b>Connectivity</b> | <b>Dunn</b> | <b>Silhouette</b> |
|-----------------------------------|---------------------|-------------|-------------------|
| <b>10 <math>\mu</math>M RWRWR</b> | 5.49                | 0.06        | 0.67              |
| <b>50 <math>\mu</math>M RWRWR</b> | 12.52               | 0.04        | 0.70              |
| <b>10 <math>\mu</math>M OWRWR</b> | 12.02               | 0.01        | 0.65              |
| <b>50 <math>\mu</math>M OWRWR</b> | 11.78               | 0.02        | 0.68              |
| <b>10 <math>\mu</math>M TAT</b>   | 7.28                | 0.05        | 0.61              |
| <b>50 <math>\mu</math>M TAT</b>   | 16.39               | 0.03        | 0.61              |
| <b>10 <math>\mu</math>M ARG</b>   | 8.62                | 0.03        | 0.66              |
| <b>50 <math>\mu</math>M ARG</b>   | 13.76               | 0.10        | 0.68              |

Connectivity index, Dunn index, and Silhouette width values for assessing the goodness of the clustering in terms of compactness, connectedness, and separation of the cluster partitions.
